# Supplementary material for: Skin Cell and Tissue Responses to Cross-Linked Hyaluronic Acid in Low-Grade Inflammatory Conditions
Source: Hindawi journal article supplement (doi:10.1155/2023/3001080), 2023-08-26
Supplement: f1 [file 3001080.f1.pdf]

## Supplementary Materials

Supplementary Table S1: Characterization of the pro-inflammatory M1 culture medium

| Cytokines     | M0 (Mean pg/ml $\pm$ SD) | M1 (Mean pg/ml $\pm$ SD) | p-value |
|---------------|--------------------------|--------------------------|---------|
| TNF- $\alpha$ | 119 $\pm$ 2              | 187 $\pm$ 2              | 0.0211  |
| IL-8          | 4151 $\pm$ 51            | 21475 $\pm$ 39           | <0.0001 |
| CCL2          | 198 $\pm$ 14             | 213 $\pm$ 11             | ns      |
| IL-1 $\beta$  | 255 $\pm$ 15             | 94 $\pm$ 2               | <0.0001 |
| IFN-gamma     | 88 $\pm$ 2               | 181 $\pm$ 7              | 0.0014  |
| CCL5/RANTES   | 202 $\pm$ 7              | 410 $\pm$ 8              | <0.0001 |
| GM-CSF        | 120 $\pm$ 10             | 308 $\pm$ 5              | <0.0001 |
| VEGF-A        | 72 $\pm$ 2               | 147 $\pm$ 2              | <0.0001 |

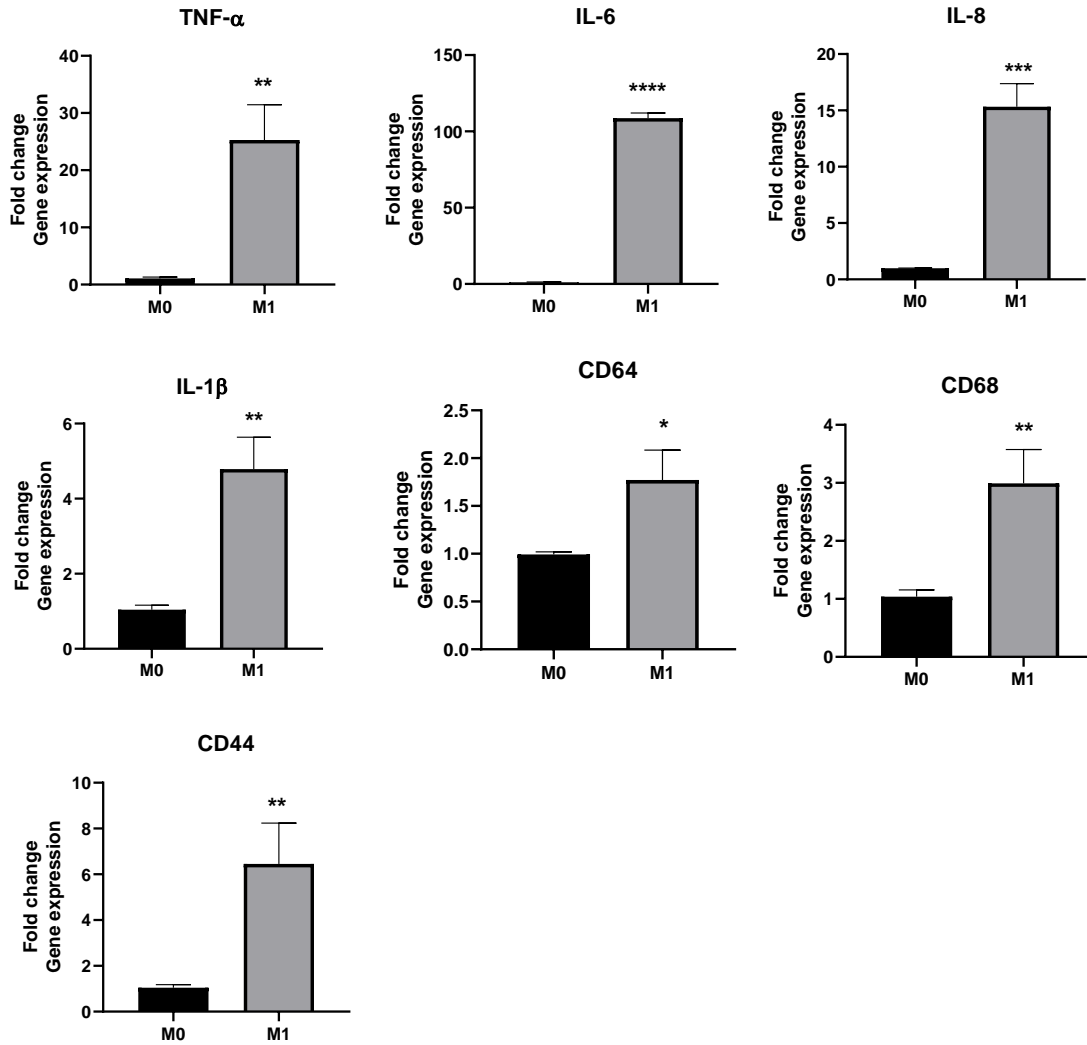

Supplementary Figure S1: Pro-inflammatory Macrophages M1 phenotypes. Mean $\pm$ SD of M1 markers gene expression of TNF- $\alpha$ , IL-6, IL-8, IL1 $\beta$ , CD64, CD68 and CD44. Genes expressions are normalized with GAPDH and TBP and data are represented in fold change. \*P<0.05, \*\*P<0.01, \*\*\*P<0.001, \*\*\*\*P<0.0001 vs macrophages M0. Data are representative of at least three independent experiments.

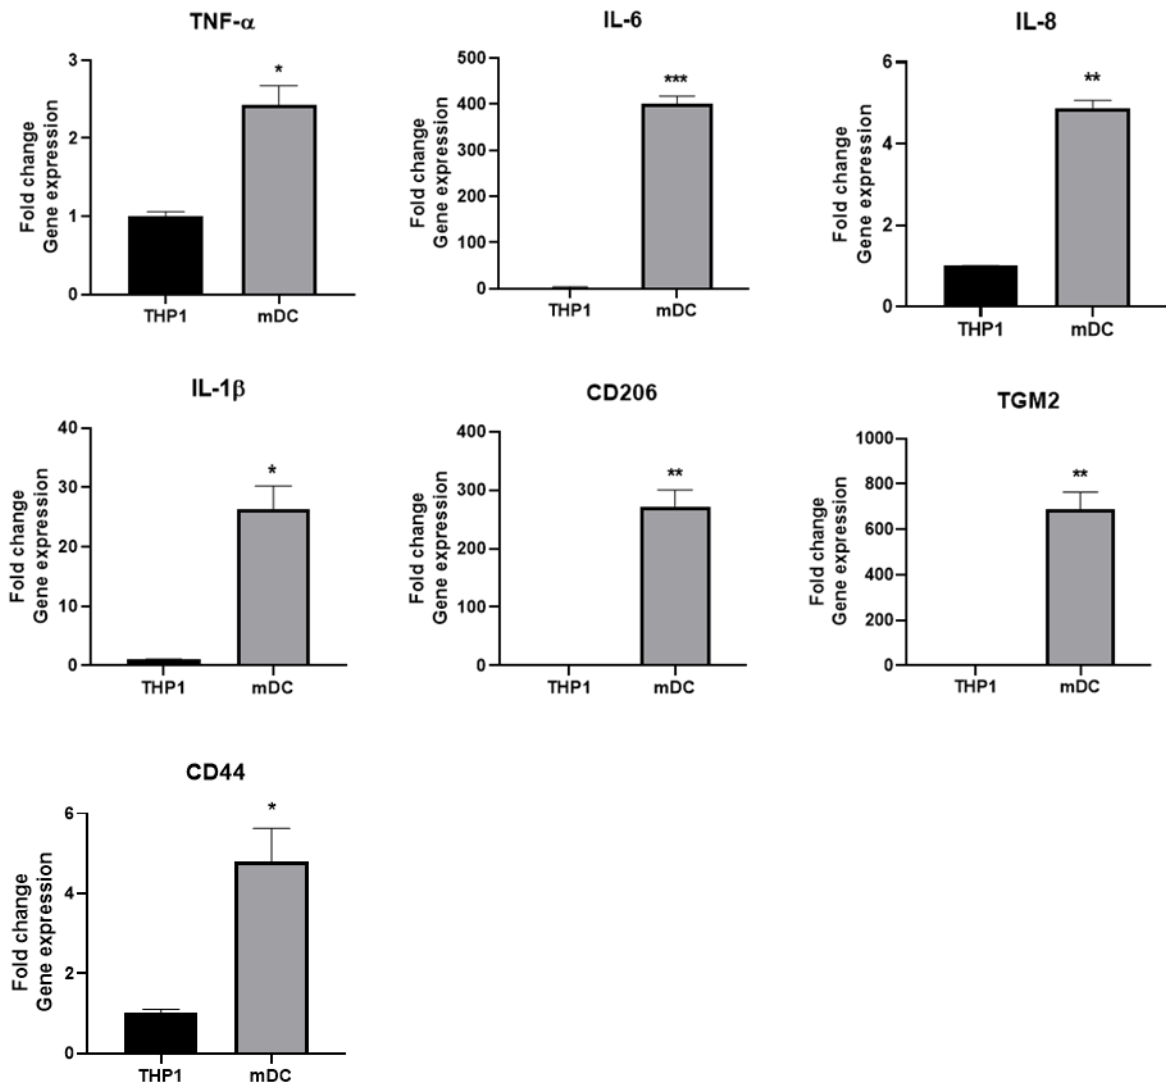

Supplementary Figure S2: Pro-inflammatory mature dendritic cell (mDC) phenotype. Mean $\pm$ SD of mDC markers gene expression of TNF- $\alpha$ , IL-6, IL-8, IL1 $\beta$ , CD206, TGM2 and CD44. Genes expressions are normalized with GAPDH and TBP and data are represented in fold change. \*P<0.05, \*\*P<0.01, \*\*\*P<0.001 vs THP1. Data are representative of at least three independent experiments.

### A Macrophages M1 LPS stimulated

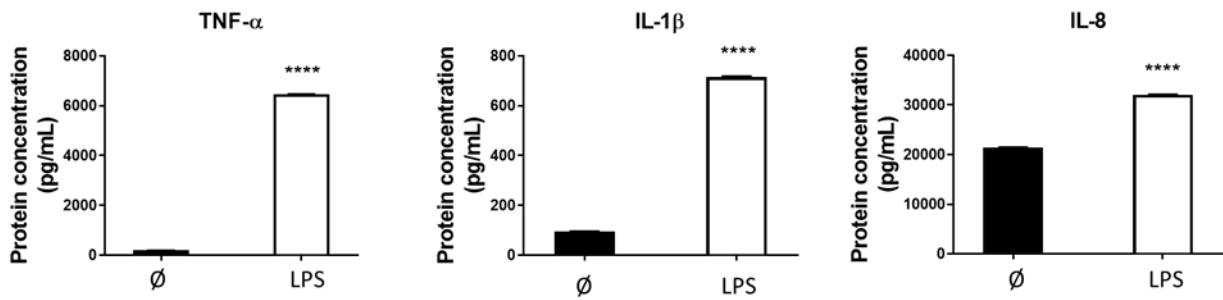

### B mDC LPS stimulated

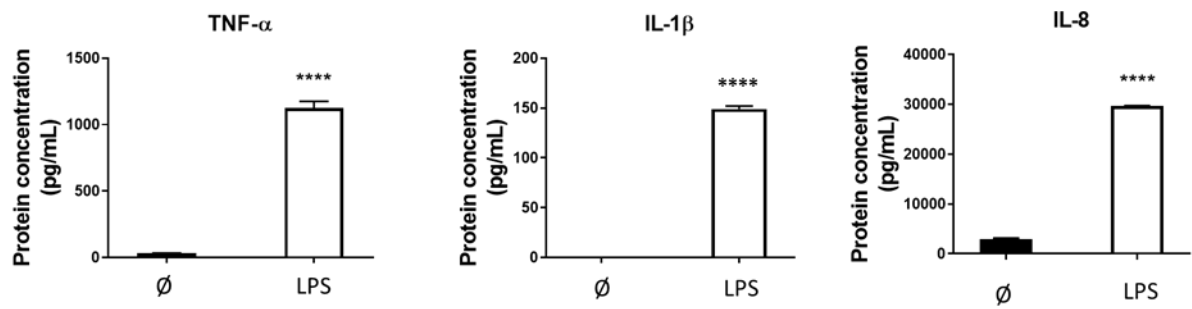

Supplementary Figure S3: LPS effect on M1 and mDC cytokine production at 24h. Supernatant produced by immune cells. Mean $\pm$ SD of protein level (pg/ml) of TNF- $\alpha$ , IL-1 $\beta$  and IL-8 in macrophages M1 (A) and mDC (B) after 24h stimulation of LPS at 1 $\mu$ g/ml. Data are representative of at least three independent experiments.

\*\*\*\*P<0.0001 vs unstimulated (∅) immune cells.

## A Macrophage M1 cytokine secretion

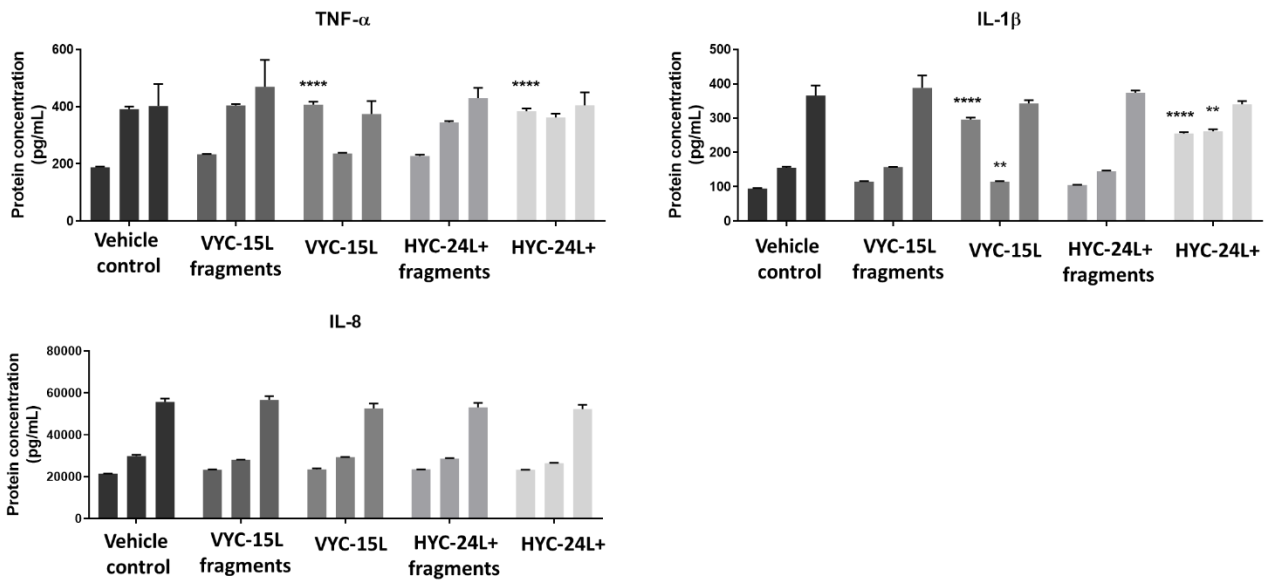

## B mDC cytokine secretion

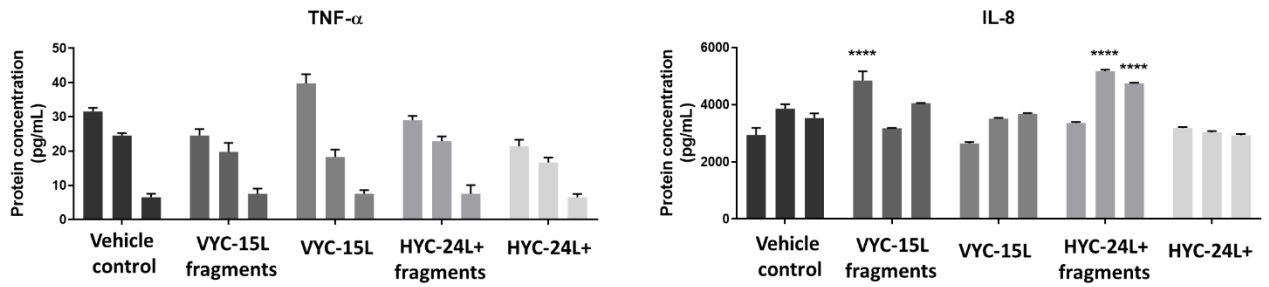

Supplementary Figure S4: Effects of HA and HA degradation products on cytokines release by M1 and mDC at the 24h, 48h and 72h time points. Mean $\pm$ SD of protein level (pg/ml) of TNF- $\alpha$ , IL-8 and IL-1 $\beta$  (except for mDC), in the condition medium of M1 (A) and mDC (B) after stimulation with vehicle, VYC-15L fragments, VYC-15L, HYC-24L+ fragments and HYC-24L+. For each condition, left column corresponds to 24h, middle column corresponds to 48h and right column corresponds to 72h stimulation. Data are representative of at least three independent experiments. \*\*P<0.01, \*\*\*P<0.0001 vs the respective vehicle control.

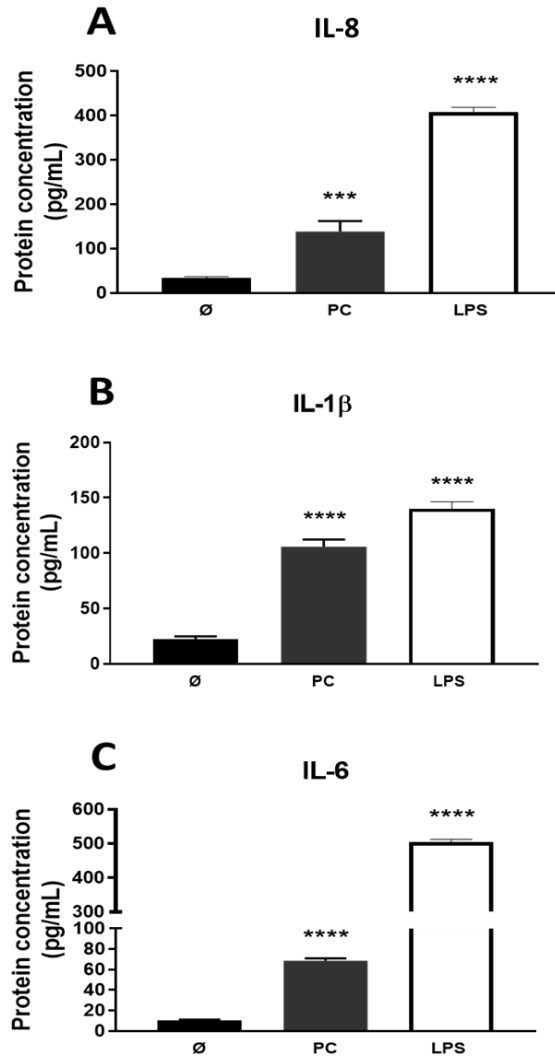

Supplementary figure S5: low-grade inflammation phenotype for preconditioned dermal fibroblasts. Cytokine release in unstimulated ( $\emptyset$ ), preconditioned (PC) and LPS-stimulated dermal fibroblasts. Mean $\pm$ SD of protein level (pg/ml) of IL-8 (A), IL-1 $\beta$  (B) and IL-6 (C) 72h post preconditioning. LPS is considered as the positive control for inflammation. \*\*\*P<0.001, \*\*\*\*P<0.0001. vs non-preconditioned (non-inflammatory) unstimulated fibroblast ( $\emptyset$ ).

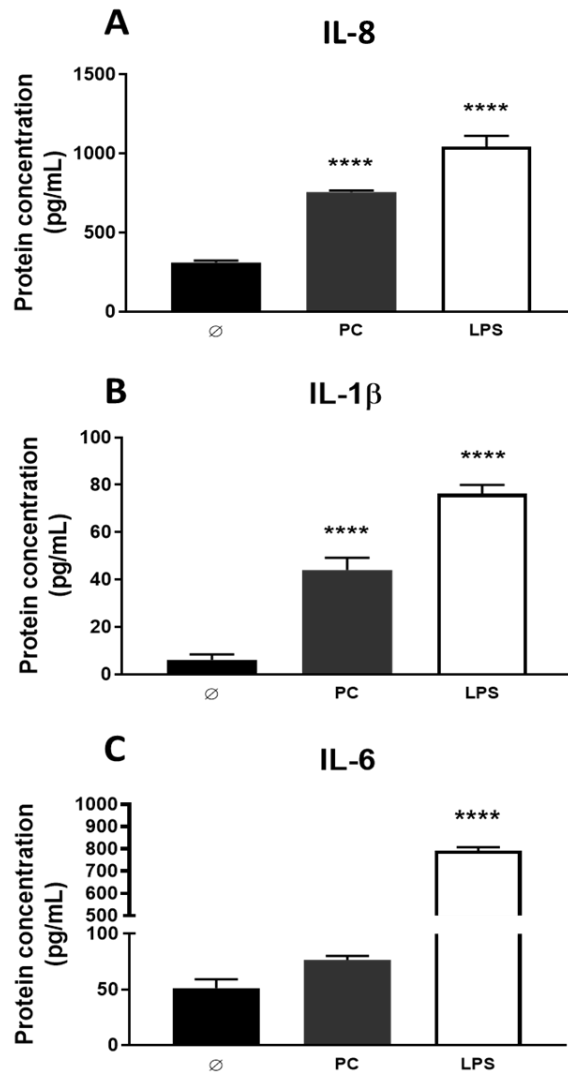

Supplementary Figure S6: low-grade inflammation phenotype for preconditioned HDMEC. Cytokine release in unstimulated ( $\emptyset$ ), preconditioned (PC) and LPS-stimulated dermal endothelial cells (HDMEC). Mean $\pm$ SD of protein level (pg/ml) of IL-8 (A), IL-1 $\beta$  (B) and IL-6 (C) 72h-post preconditioning. LPS is considered as positive control for inflammation. \*\*\*\*P<0.00001 vs non-preconditioned (non-inflammatory) unstimulated HDMEC ( $\emptyset$ ).

### A Plasma analysis

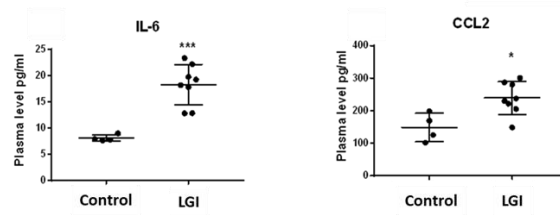

### B Skin mRNA expression

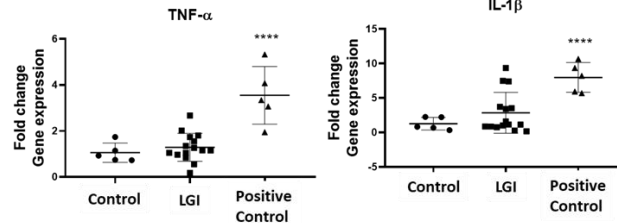

### C Skin protein quantification

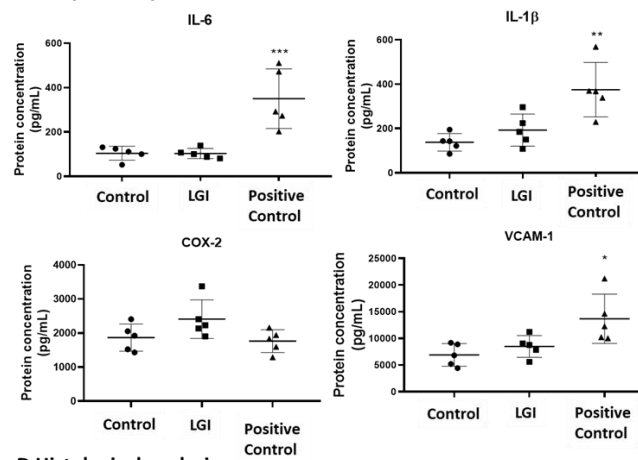

### D Histological analysis

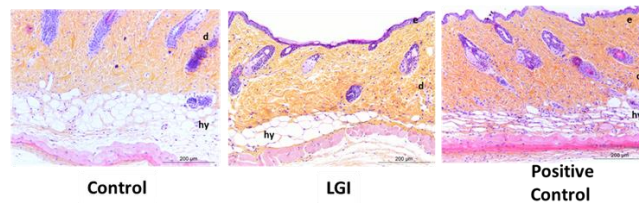

### E Vascular properties

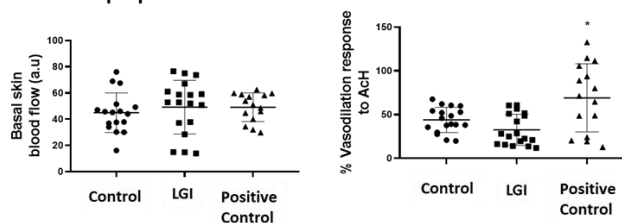

Supplementary figure S7: Phenotype of systemic low-grade inflammation induced by a chronic treatment of low dose of LPS in mice. Scatter dot plot showing: A, IL-6 and CCL2 plasma level in control mice (n=4) and in systemic low-grade inflammatory (LGI) mice (n=8); B, fold change gene expression of TNF- $\alpha$  and IL-1 $\beta$  in skin biopsy from control mice (n=5), LGI mice (n=15) and positive control mice treated with an acute intradermal injection of LPS (n=5); C, protein level of IL-6, IL-1 $\beta$ , COX-2 and VCAM-1 in control mice (n=5), LGI mice (n=5) and positive LPS control mice (n=5); D, representative histological analysis with HES coloration skin in one control mouse, one LGI mouse and one positive LPS control mouse; E, vascular properties with basal skin blood flow and acetylcholine (ach)-mediated microvascular reactivity in control mice (n=17), LGI mice (n=18) and positive LPS control mice (n=15). \*P<0.05, \*\*P<0.01, \*\*\*P<0.001, \*\*\*\*P<0.0001 vs control mice.



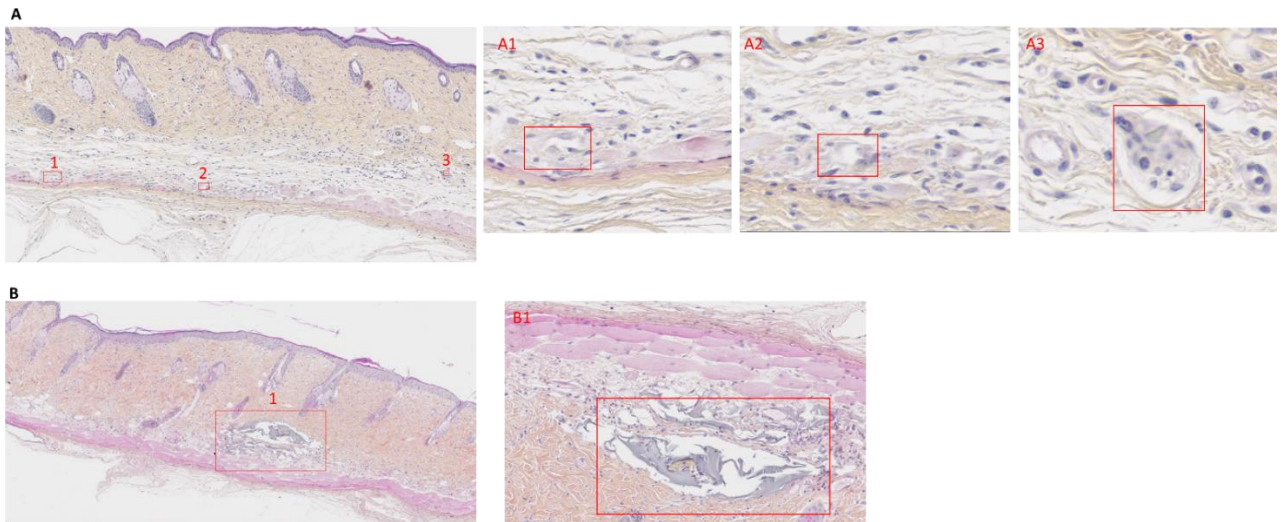

Supplementary Figure S8: Remained injected hyaluronan in the skin of low-grade inflammation (LGI) mice. Representative histological analysis with HES coloration skin in one LGI mouse 24h after an acute intradermal injection (20 $\mu$ l) of VYC-15L fragments (A) and HYC-24L fragments (B). Numbers indicate locations with remained injected hyaluronan, which are shown with a larger magnification on the right-hand side.
